# Supplementary material for: Accurate measurement of stiffness of leukemia cells and leukocytes using an optical trap by a rate-jump method
Source: Royal Society of Chemistry journal article supplement (doi:10.1039/c3ra45835k), 2014-01-01
Supplement: c3ra45835k.pdf [file c3ra45835k.pdf]

### **Supplementary figure 1:**

Time-lapse images of an indentation on K562 sample. The images were captured under the optical microscope in the Optical Tweezers system with objective lens at  $100\times$  magnification. A  $2.5\text{-}\mu\text{m}$  diameter polystyrene bead was used for the indentation. The indentation process involved loading, hold and retraction, as follows:

Image 1: before indentation;

Image 2: indentation begins;

Image 3: during the loading process;

Image 4: during holding;

Image 5, 6 and 7: during unloading process;

Image 8: after unloading.

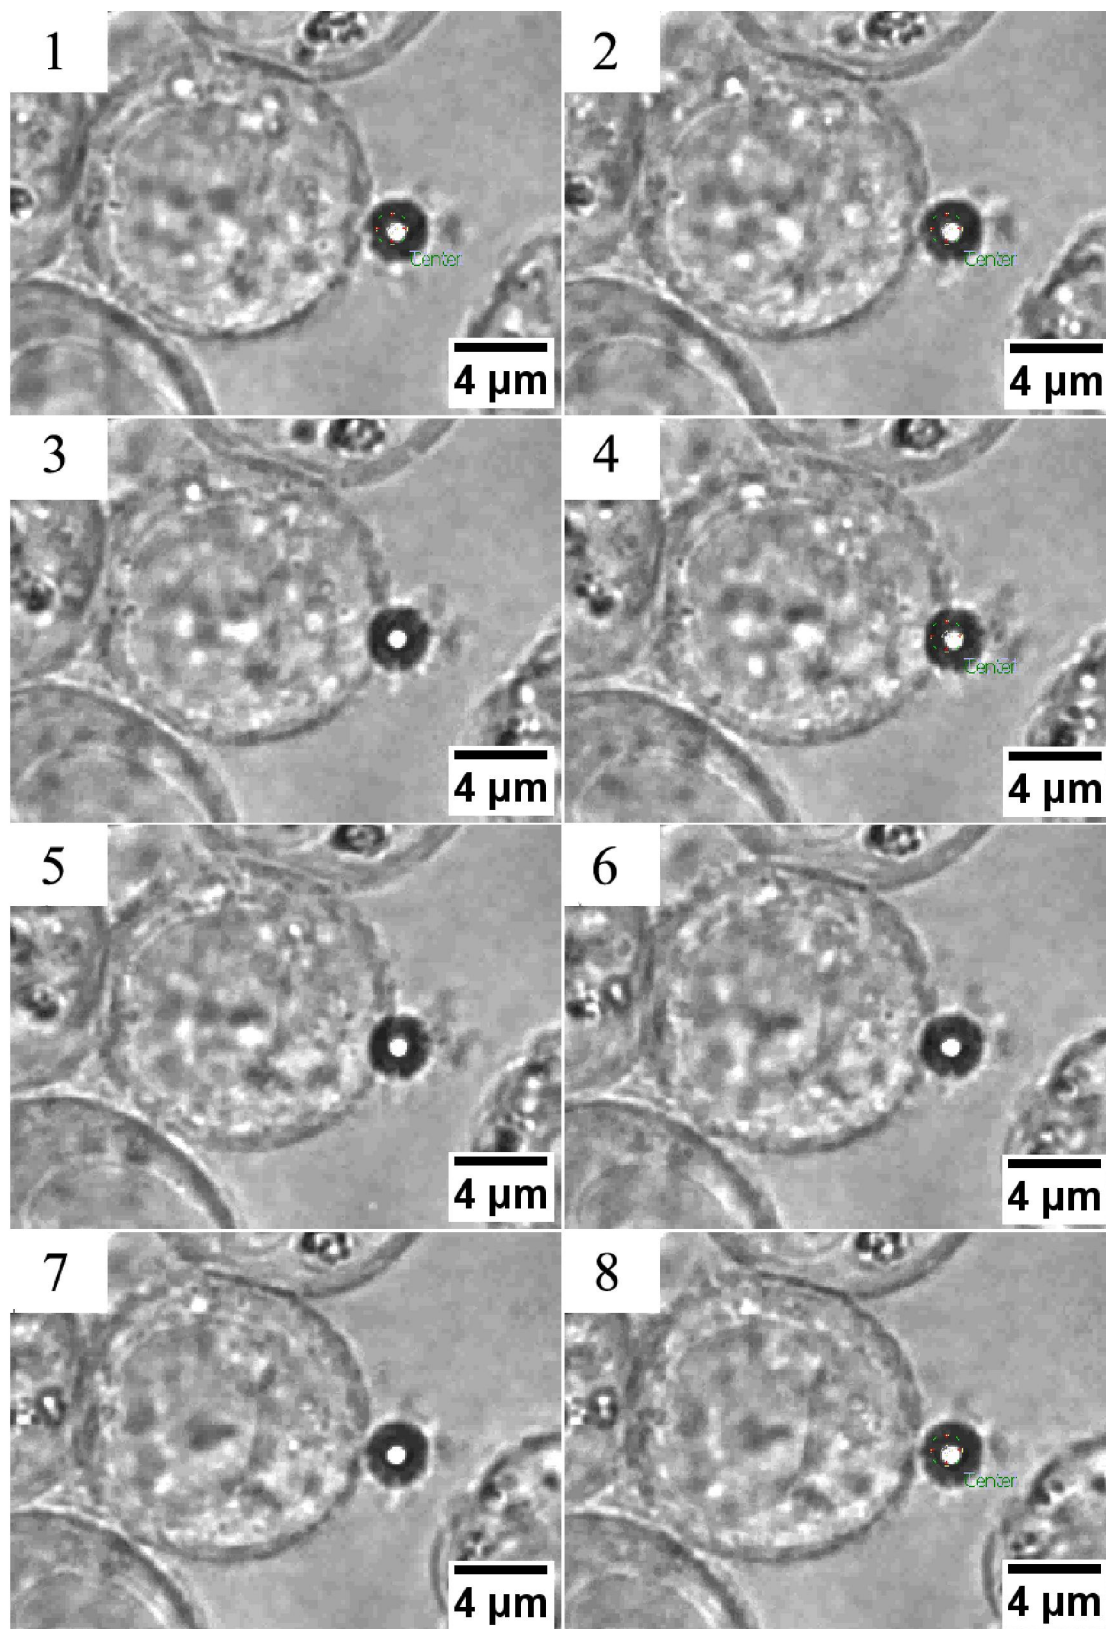

Supplementary figure 1
